# Supplementary material
Source: Springer Nature journal article supplement (https://www.springermedizin.de/resource/supplementary/13058_2010_9479_MOESM7_ESM.pdf/9702240)

Direct binding with  
Survivin promoter

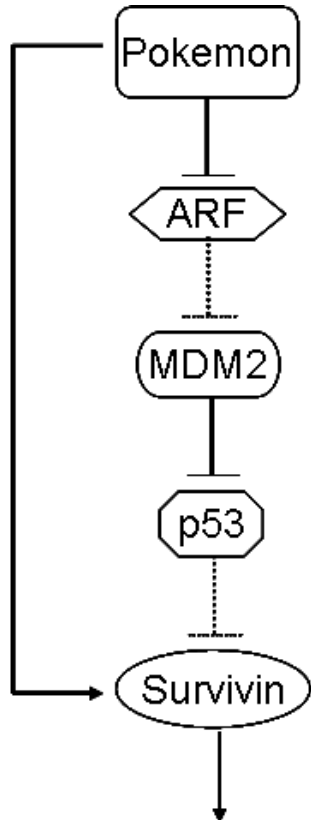

Anti-apoptosis and cell survival

Supplement: MOESM7 [file 9702240]
